# Supplementary material for: Medicaid Expansion and Racial-Ethnic Health Care Coverage Disparities Among Low-Income Adults With Substance Use Disorders
Source: Atypon-hosted journal article supplement (doi:10.1176/appi.ps.20220155), 2022-11-02
Supplement: appi.ps.20220155.ds001.pdf [file appi.ps.20220155.ds001.pdf]

| Table S1: ACA expansion and non-expansion states                                                                 |                                                                                                      |
|------------------------------------------------------------------------------------------------------------------|------------------------------------------------------------------------------------------------------|
| Expansion States                                                                                                 | Non-Expansion States                                                                                 |
| AZ, AR, CA, CO, CT, DE, HI, IL, IA, KY,<br>MD, MA, MI, MN, NH, NV, NJ, NM, NY, ND,<br>OH, OR, RI, VT, WA, WV, DC | AL, AK, FL, GA, IN, ID, KS, LA, ME,<br>MS, MO, MT, NE, NC, OK, PA, SC,<br>SD, TN, TX, UT, VA, WI, WY |

| Table S2. Characteristics of White, Black, and Hispanic low-income adults with selected substance use disorders in states that did and did not expand Medicaid eligibility in 2014 or earlier |                  |                      |         |                  |                      |         |                  |                      |         |
|-----------------------------------------------------------------------------------------------------------------------------------------------------------------------------------------------|------------------|----------------------|---------|------------------|----------------------|---------|------------------|----------------------|---------|
|                                                                                                                                                                                               | White            |                      |         | Black            |                      |         | Hispanic         |                      |         |
|                                                                                                                                                                                               | Expansion States | Non-Expansion States | P value | Expansion States | Non-Expansion States | P value | Expansion States | Non-Expansion States | P value |
| Characteristics                                                                                                                                                                               | % (SE)           | % (SE)               |         | % (SE)           | % (SE)               |         | % (SE)           | % (SE)               |         |
| <b>Age range, yrs</b>                                                                                                                                                                         |                  |                      | 0.950   |                  |                      | 0.842   |                  |                      | 0.819   |
| 18-24                                                                                                                                                                                         | 40.29 (1.01)     | 39.84 (1.24)         |         | 27.39 (1.32)     | 26.41 (1.28)         |         | 36.52 (1.42)     | 34.82 (1.99)         |         |
| 25-34                                                                                                                                                                                         | 23.49 (0.91)     | 23.01 (0.95)         |         | 25.76 (1.61)     | 25.43 (1.57)         |         | 28.42 (1.55)     | 28.84 (1.95)         |         |
| 35-44                                                                                                                                                                                         | 14.14 (0.75)     | 14.15 (0.86)         |         | 17.37 (1.48)     | 16.17 (1.30)         |         | 20.51 (1.60)     | 19.34 (2.15)         |         |
| 45-64                                                                                                                                                                                         | 22.08 (1.11)     | 23.01 (1.25)         |         | 29.47 (2.29)     | 31.99 (2.06)         |         | 14.54 (1.68)     | 17.00 (2.55)         |         |
| <b>Sex</b>                                                                                                                                                                                    |                  |                      | 0.002   |                  |                      | 0.626   |                  |                      | 0.570   |
| Male                                                                                                                                                                                          | 57.93 (1.02)     | 62.32 (1.02)         |         | 60.68 (1.66)     | 61.84 (1.64)         |         | 66.73 (1.64)     | 65.28 (2.04)         |         |
| Female                                                                                                                                                                                        | 42.07 (1.02)     | 37.68 (1.02)         |         | 39.32 (1.66)     | 38.16 (1.64)         |         | 33.27 (1.64)     | 34.72 (2.04)         |         |
| <b>Marital status</b>                                                                                                                                                                         |                  |                      | 0.002   |                  |                      | 0.395   |                  |                      | 0.008   |
| Married                                                                                                                                                                                       | 12.52 (0.71)     | 15.43 (0.93)         |         | 12.10 (1.46)     | 14.43 (1.49)         |         | 24.80 (1.80)     | 31.28 (2.44)         |         |
| Sep, Div, Wid                                                                                                                                                                                 | 21.32 (1.01)     | 24.03 (1.20)         |         | 18.34 (1.81)     | 15.94 (1.47)         |         | 10.95 (1.34)     | 14.21 (1.77)         |         |
| Never married                                                                                                                                                                                 | 66.16 (1.10)     | 60.53 (1.27)         |         | 69.56 (2.11)     | 69.63 (1.83)         |         | 64.24 (1.93)     | 54.51 (2.41)         |         |
| <b>Education level</b>                                                                                                                                                                        |                  |                      | 0.014   |                  |                      | 0.002   |                  |                      | 0.814   |
| Less than high schl                                                                                                                                                                           | 20.76 (0.90)     | 24.56 (1.09)         |         | 32.17 (1.84)     | 39.00 (1.80)         |         | 42.21 (1.89)     | 43.37 (2.44)         |         |
| High schl graduate                                                                                                                                                                            | 29.35 (0.93)     | 30.01 (1.09)         |         | 35.80 (1.94)     | 36.55 (1.80)         |         | 29.64 (1.55)     | 28.66 (1.86)         |         |
| Some college                                                                                                                                                                                  | 36.63 (1.02)     | 34.35 (1.14)         |         | 26.18 (1.82)     | 21.59 (1.40)         |         | 23.03 (1.39)     | 22.01 (1.89)         |         |
| College graduate                                                                                                                                                                              | 13.27 (0.67)     | 11.08 (0.68)         |         | 5.86 (0.92)      | 2.87 (0.48)          |         | 5.13 (0.68)      | 5.97 (0.90)          |         |
| <b>Employed</b>                                                                                                                                                                               | 52.32 (1.00)     | 52.88 (1.13)         | 0.710   | 40.46 (1.78)     | 43.38 (1.74)         | 0.235   | 60.24 (1.76)     | 65.21 (2.53)         | 0.112   |
| <b>Health status</b>                                                                                                                                                                          |                  |                      | 0.857   |                  |                      | 0.480   |                  |                      | 0.261   |
| Excellent                                                                                                                                                                                     | 13.83 (0.63)     | 13.65 (0.68)         |         | 14.19 (1.22)     | 13.94 (1.13)         |         | 14.30 (1.16)     | 18.03 (1.60)         |         |
| Very good                                                                                                                                                                                     | 32.25 (0.92)     | 31.12 (1.00)         |         | 27.89 (1.62)     | 25.54 (1.42)         |         | 24.62 (1.43)     | 24.78 (1.91)         |         |
| Good                                                                                                                                                                                          | 32.25 (0.98)     | 33.02 (1.08)         |         | 29.37 (1.65)     | 32.86 (1.74)         |         | 36.60 (1.78)     | 33.14 (2.21)         |         |
| Fair/poor                                                                                                                                                                                     | 21.67 (0.93)     | 22.22 (1.07)         |         | 28.55 (1.87)     | 27.65 (1.81)         |         | 24.48 (1.67)     | 24.05 (2.10)         |         |
| <b>SUD, past year</b>                                                                                                                                                                         |                  |                      |         |                  |                      |         |                  |                      |         |
| Alcohol                                                                                                                                                                                       | 76.61 (0.85)     | 81.06 (0.87)         | <.001   | 72.07 (1.60)     | 73.72 (1.52)         | 0.464   | 81.47 (1.37)     | 87.10 (1.37)         | 0.005   |
| Cannabis                                                                                                                                                                                      | 26.45 (0.86)     | 22.36 (0.89)         | 0.001   | 35.38 (1.69)     | 32.91 (1.68)         | 0.294   | 24.53 (1.41)     | 17.30 (1.53)         | <.001   |
| Cocaine                                                                                                                                                                                       | 7.36 (0.59)      | 7.81 (0.66)          | 0.611   | 12.26 (1.31)     | 12.00 (1.34)         | 0.890   | 6.28 (0.81)      | 7.97 (1.33)          | 0.277   |
| Heroin                                                                                                                                                                                        | 7.28 (0.61)      | 4.58 (0.42)          | <.001   | 3.81 (0.78)      | 1.42 (0.48)          | 0.009   | 4.07 (0.80)      | 2.03 (0.70)          | 0.058   |

Data from 2008-2019 NSDUH. Results are based on analyses of weighted data. White denotes non-Hispanic White, Black denotes non-Hispanic Black. Sep, Div, Wid denotes separated, divorced or widowed marital status.

Table S3. Disparities in health coverage and substance use treatment for three low income<sup>A</sup> racial/ethnic adult groups with substance use disorders in expansion and non-expansion states after implementation of the Affordable Care Act Medicaid expansion provision excluding states that expanded Medicaid before 2014 (California, Connecticut, District of Columbia, Minnesota, New Jersey, and Washington)

| Coverage/Use                             | Expansion States           |             |                             |            |                                  |                | Non-Expansion States       |            |                             |            |                                  |               |
|------------------------------------------|----------------------------|-------------|-----------------------------|------------|----------------------------------|----------------|----------------------------|------------|-----------------------------|------------|----------------------------------|---------------|
|                                          | Pre-Expansion<br>2008-2013 |             | Post-Expansion<br>2014-2019 |            | Difference Estimate <sup>B</sup> |                | Pre-Expansion<br>2008-2013 |            | Post-Expansion<br>2014-2019 |            | Difference Estimate <sup>B</sup> |               |
|                                          | %                          | 95% CI      | %                           | 95% CI     | %                                | 95% CI         | %                          | 95% CI     | %                           | 95% CI     | %                                | 95% CI        |
| Uninsurance                              |                            |             |                             |            |                                  |                |                            |            |                             |            |                                  |               |
| White                                    | 33.5                       | 30.7, 36.4  | 14.0                        | 12.0, 16.1 | -19.53                           | -23.04, -16.02 | 42.3                       | 38.9, 45.8 | 31.7                        | 28.7, 34.8 | -10.62                           | -15.16, -6.08 |
| Black                                    | 30.7                       | 26.2, 35.5  | 13.7                        | 10.1, 18.3 | -16.98                           | -23.18, -10.78 | 44.6                       | 39.3, 50.1 | 33.1                        | 28.8, 37.8 | -11.48                           | -18.59, -4.38 |
| Hispanic                                 | 43.6                       | 37.2, 50.1  | 22.3                        | 17.6, 27.7 | -21.33                           | -29.50, -13.15 | 59.6                       | 52.8, 66.1 | 51.8                        | 45.7, 57.8 | -7.81                            | -16.78, 1.15  |
| Medicaid                                 |                            |             |                             |            |                                  |                |                            |            |                             |            |                                  |               |
| White                                    | 20.5                       | 18.1, 23.1  | 40.7                        | 37.6, 43.8 | 20.24                            | 16.28, 24.21   | 13.7                       | 11.7, 16.0 | 20.9                        | 18.4, 23.7 | 7.18                             | 3.78, 10.58   |
| Black                                    | 37.7                       | 32.2, 43.6  | 50.0                        | 44.1, 56.0 | 12.31                            | 3.96, 20.67    | 23.0                       | 19.6, 26.8 | 28.4                        | 24.5, 32.6 | 5.39                             | -0.04, 10.81  |
| Hispanic                                 | 25.3                       | 20.2, 31.2  | 46.0                        | 40.1, 52.0 | 20.71                            | 12.62, 28.80   | 14.3                       | 10.4, 19.4 | 17.2                        | 12.4, 23.3 | 2.84                             | -4.19, 9.87   |
| Private Insurance                        |                            |             |                             |            |                                  |                |                            |            |                             |            |                                  |               |
| White                                    | 32.2                       | 29.8, 34.6  | 32.5                        | 29.7, 35.5 | 0.36                             | -3.30, 4.02    | 31.8                       | 29.0, 34.8 | 34.9                        | 32.3, 37.6 | 3.07                             | -0.65, 6.80   |
| Black                                    | 18.1                       | 14.4, 22.6  | 22.2                        | 17.3, 28.0 | 4.01                             | -2.75, 10.77   | 18.8                       | 15.2, 23.0 | 23.4                        | 19.5, 27.9 | 4.63                             | -1.06, 10.32  |
| Hispanic                                 | 20.6                       | 16.6, 25.1  | 22.2                        | 17.9, 27.2 | 1.64                             | -4.62, 7.90    | 16.5                       | 13.0, 20.8 | 22.1                        | 18.2, 26.6 | 5.62                             | -0.07, 11.32  |
| Other insurance                          |                            |             |                             |            |                                  |                |                            |            |                             |            |                                  |               |
| White                                    | 13.8                       | 11.6, 16.36 | 12.6                        | 10.6, 14.9 | -1.21                            | -4.38, 1.96    | 11.6                       | 9.6, 14.0  | 12.5                        | 10.4, 14.9 | 0.86                             | -2.24, 3.96   |
| Black                                    | 12.6                       | 9.2, 17.1   | 13.7                        | 10.0, 18.4 | 1.01                             | -4.68, 6.71    | 12.9                       | 9.5, 17.2  | 14.1                        | 11.2, 17.7 | 1.26                             | -3.78, 6.29   |
| Hispanic                                 | 10.6                       | 7.0, 15.9   | 9.5                         | 5.6, 15.6  | -1.14                            | -7.70, 5.42    | 9.1                        | 5.8, 14.0  | 8.8                         | 5.5, 13.8  | -0.31                            | -5.99, 5.38   |
| SUD treatment, past year                 |                            |             |                             |            |                                  |                |                            |            |                             |            |                                  |               |
| White                                    | 17.5                       | 15.1, 20.1  | 15.9                        | 13.8, 18.3 | -1.55                            | -4.87, 1.77    | 13.2                       | 10.9, 15.9 | 14.9                        | 12.9, 17.1 | 1.67                             | -1.58, 4.92   |
| Black                                    | 13.3                       | 9.7, 18.0   | 14.3                        | 10.6, 19.1 | 1.06                             | -4.84, 6.94    | 9.5                        | 6.9, 12.9  | 8.0                         | 6.0, 10.7  | -1.44                            | -5.23, 2.34   |
| Hispanic                                 | 9.4                        | 6.5, 13.4   | 11.2                        | 7.6, 16.3  | 1.82                             | -3.63, 7.26    | 8.1                        | 4.8, 13.1  | 7.1                         | 4.8, 10.4  | -0.97                            | -5.82, 3.87   |
| Income-eligible SUD treatment, past year |                            |             |                             |            |                                  |                |                            |            |                             |            |                                  |               |
| White                                    | 16.0                       | 13.7, 18.6  | 14.9                        | 12.8, 17.2 | -1.14                            | -4.41, 2.13    | 11.7                       | 9.5, 14.3  | 13.6                        | 11.7, 15.8 | 1.95                             | -1.21, 5.12   |
| Black                                    | 10.9                       | 7.6, 15.3   | 13.1                        | 9.5, 17.9  | 2.23                             | -3.44, 7.90    | 8.6                        | 6.1, 12.0  | 7.1                         | 5.2, 9.6   | -1.48                            | -5.10, 2.15   |
| Hispanic                                 | 7.8                        | 5.3, 11.3   | 9.7                         | 6.4, 14.5  | 1.91                             | -3.04, 6.86    | 5.7                        | 3.4, 9.4   | 6.3                         | 4.1, 9.5   | 0.60                             | -3.31, 4.52   |

Data from the 2008-2019 National Survey on Drug Use and Health. <sup>A</sup> Low income defined as  $\leq 138\%$  of the Federal Poverty Level (FPL).  
<sup>B</sup> Differences were estimated using predicted marginal effects at representative values from multivariable logistic regression models that controlled for age, sex, the post-ACA indicator (2014-2019), and the interaction between the post-ACA indicator and the racial/ethnic group.  
We then estimated using predicted marginal effects at representative values.

Table S4. Disparities in health coverage and substance use treatment for three low income<sup>A</sup> racial/ethnic adult groups with substance use disorders in expansion and non-expansion states after implementation of the Affordable Care Act Medicaid expansion provision excluding states that expanded Medicaid during 2015-2019 (Alaska, Indiana, Pennsylvania, Montana, Louisiana, Virginia, and Maine)

| Coverage/Use                             | Expansion States           |              |                             |            |                                  |                | Non-Expansion States       |            |                             |            |                                  |               |
|------------------------------------------|----------------------------|--------------|-----------------------------|------------|----------------------------------|----------------|----------------------------|------------|-----------------------------|------------|----------------------------------|---------------|
|                                          | Pre-Expansion<br>2008-2013 |              | Post-Expansion<br>2014-2019 |            | Difference Estimate <sup>B</sup> |                | Pre-Expansion<br>2008-2013 |            | Post-Expansion<br>2014-2019 |            | Difference Estimate <sup>B</sup> |               |
|                                          | %                          | 95% CI       | %                           | 95% CI     | %                                | 95% CI         | %                          | 95% CI     | %                           | 95% CI     | %                                | 95% CI        |
| Uninsurance                              |                            |              |                             |            |                                  |                |                            |            |                             |            |                                  |               |
| White                                    | 32.9                       | 30.2, 35.7   | 13.4                        | 11.7, 15.2 | -19.52                           | -22.75, -16.29 | 44.3                       | 40.3, 48.4 | 35.1                        | 31.2, 39.1 | -9.29                            | -14.90, -3.69 |
| Black                                    | 31.3                       | 27.1, 35.9   | 13.1                        | 9.9, 17.1  | -18.24                           | -24.00, -12.54 | 44.5                       | 38.0, 51.1 | 37.4                        | 32.0, 43.2 | -7.05                            | -15.78, 1.67  |
| Hispanic                                 | 46.3                       | 41.1, 51.8   | 25.8                        | 22.1, 29.8 | -20.55                           | -27.16, -13.94 | 61.5                       | 54.9, 67.6 | 55.3                        | 48.6, 61.7 | -6.22                            | -15.36, 2.92  |
| Medicaid                                 |                            |              |                             |            |                                  |                |                            |            |                             |            |                                  |               |
| White                                    | 19.3                       | 17.07, 21.81 | 41.0                        | 38.0, 44.1 | 21.71                            | 17.91, 25.52   | 13.2                       | 10.8, 16.0 | 19.4                        | 16.3, 22.9 | 6.23                             | 2.04, 10.43   |
| Black                                    | 36.5                       | 31.7, 41.6   | 50.9                        | 45.7, 56.2 | 14.47                            | 7.16, 21.78    | 22.4                       | 18.4, 27.0 | 24.6                        | 20.6, 29.1 | 2.18                             | -3.86, 8.22   |
| Hispanic                                 | 27.2                       | 22.4, 32.5   | 44.2                        | 40.0, 48.5 | 17.06                            | 10.50, 23.62   | 13.2                       | 9.2, 18.6  | 15.2                        | 10.4, 21.7 | 2.01                             | -5.26, 9.28   |
| Private Insurance                        |                            |              |                             |            |                                  |                |                            |            |                             |            |                                  |               |
| White                                    | 32.9                       | 30.5, 35.31  | 32.5                        | 30.0, 35.1 | -0.36                            | -3.76, 3.03    | 30.9                       | 27.7, 34.2 | 34.2                        | 31.0, 37.5 | 3.32                             | -1.18, 7.82   |
| Black                                    | 18.8                       | 15.0, 23.4   | 21.8                        | 17.6, 26.7 | 2.97                             | -3.23, 9.21    | 20.0                       | 15.6, 25.2 | 22.8                        | 18.5, 27.8 | 2.83                             | -3.83, 9.50   |
| Hispanic                                 | 17.1                       | 14.2, 20.5   | 20.7                        | 17.6, 24.2 | 3.59                             | -0.88, 8.07    | 14.9                       | 11.5, 19.2 | 20.7                        | 16.8, 25.4 | 5.81                             | 0.07, 11.55   |
| Other insurance                          |                            |              |                             |            |                                  |                |                            |            |                             |            |                                  |               |
| White                                    | 14.7                       | 12.6, 17.2   | 12.7                        | 10.7, 15.0 | -1.99                            | -5.07, 1.09    | 11.2                       | 8.9, 14.1  | 11.5                        | 9.0, 14.5  | 0.25                             | -3.53, 4.03   |
| Black                                    | 12.7                       | 9.8, 16.3    | 13.4                        | 10.3, 17.3 | 0.68                             | -4.08, 5.44    | 12.5                       | 8.6, 17.9  | 14.5                        | 10.9, 19.0 | 1.95                             | -4.18, 8.08   |
| Hispanic                                 | 9.2                        | 6.4, 13.0    | 9.3                         | 6.6, 13.0  | 0.08                             | -4.44, 4.60    | 10.0                       | 6.3, 15.3  | 8.7                         | 5.1, 14.3  | -1.30                            | -7.50, 4.91   |
| SUD treatment, past year                 |                            |              |                             |            |                                  |                |                            |            |                             |            |                                  |               |
| White                                    | 19.0                       | 16.5, 21.7   | 14.4                        | 12.6, 16.5 | -4.53                            | -7.79, -1.28   | 14.4                       | 11.5, 17.8 | 14.5                        | 12.1, 17.3 | 0.15                             | -3.94, 4.24   |
| Black                                    | 14.9                       | 11.4, 19.2   | 14.1                        | 10.7, 18.2 | -0.82                            | -6.23, 4.59    | 10.3                       | 7.2, 14.6  | 7.8                         | 5.6, 10.8  | -2.49                            | -6.93, 1.96   |
| Hispanic                                 | 9.3                        | 6.7, 12.8    | 10.0                        | 7.4, 13.2  | 0.65                             | -3.46, 4.77    | 8.0                        | 4.6, 13.6  | 7.2                         | 4.6, 11.0  | -0.83                            | -6.13, 4.46   |
| Income-eligible SUD treatment, past year |                            |              |                             |            |                                  |                |                            |            |                             |            |                                  |               |
| White                                    | 17.6                       | 15.1, 20.4   | 13.5                        | 11.7, 15.6 | -4.04                            | -7.28, -0.80   | 12.4                       | 9.6, 15.8  | 13.0                        | 10.7, 15.7 | 0.65                             | -3.32, 4.62   |
| Black                                    | 13.1                       | 9.8, 17.3    | 12.4                        | 9.4, 16.2  | -0.69                            | -5.79, 4.40    | 9.6                        | 6.6, 13.8  | 6.7                         | 4.7, 9.5   | -2.92                            | -7.20, 1.35   |
| Hispanic                                 | 7.9                        | 5.5, 11.1    | 8.8                         | 6.4, 11.9  | 0.91                             | -2.97, 4.79    | 5.2                        | 2.9, 9.2   | 6.2                         | 3.9, 9.8   | 0.99                             | -3.17, 5.16   |

Data from the 2008-2019 National Survey on Drug Use and Health. <sup>A</sup> Low income defined as  $\leq 138\%$  of the Federal Poverty Level (FPL).

<sup>B</sup> Differences were estimated using predicted marginal effects at representative values from multivariable logistic regression models that controlled for age, sex, the post-ACA indicator (2014-2019), and the interaction between the post-ACA indicator and the racial/ethnic group.

We then estimated using predicted marginal effects at representative values.

Table S5. Disparities in health coverage and substance use treatment for three low income<sup>A</sup> racial/ethnic adult groups with substance use disorders in expansion and non-expansion states after implementation of the Affordable Care Act, Medicaid expansion provision controlled for age, sex, state-period unemployment, and post-ACA period indicator.

| Coverage/Use                             | Expansion States           |              |                             |            |                                  |                | Non-Expansion States       |              |                             |            |                                  |               |
|------------------------------------------|----------------------------|--------------|-----------------------------|------------|----------------------------------|----------------|----------------------------|--------------|-----------------------------|------------|----------------------------------|---------------|
|                                          | Pre-Expansion<br>2008-2013 |              | Post-Expansion<br>2014-2019 |            | Difference Estimate <sup>B</sup> |                | Pre-Expansion<br>2008-2013 |              | Post-Expansion<br>2014-2019 |            | Difference Estimate <sup>B</sup> |               |
|                                          | %                          | 95% CI       | %                           | 95% CI     | %                                | 95% CI         | %                          | 95% CI       | %                           | 95% CI     | %                                | 95% CI        |
| Uninsurance                              |                            |              |                             |            |                                  |                |                            |              |                             |            |                                  |               |
| White                                    | 33.4                       | 30.7, 36.2   | 13.3                        | 11.6, 15.2 | -20.05                           | -23.30, -16.81 | 43.1                       | 39.75, 46.5  | 31.7                        | 28.7, 34.8 | -11.40                           | -15.88, -6.91 |
| Black                                    | 32.0                       | 27.7, 36.7   | 13.4                        | 10.2, 17.5 | -18.61                           | -24.38, -12.84 | 43.9                       | 38.63, 49.41 | 31.0                        | 26.8, 35.5 | -12.98                           | -19.92, -6.03 |
| Hispanic                                 | 46.1                       | 40.8, 51.5   | 24.8                        | 21.3, 28.8 | -21.26                           | -27.78, -14.74 | 60.2                       | 53.34, 66.63 | 50.4                        | 44.4, 56.3 | -9.81                            | -18.76, -0.86 |
| Medicaid                                 |                            |              |                             |            |                                  |                |                            |              |                             |            |                                  |               |
| White                                    | 19.2                       | 17.0, 21.6   | 40.9                        | 37.9, 44.0 | 21.74                            | 17.95, 25.54   | 13.6                       | 11.57, 15.86 | 20.9                        | 18.4, 23.6 | 7.31                             | 3.93, 10.69   |
| Black                                    | 36.2                       | 31.4, 41.2   | 50.7                        | 45.4, 55.9 | 14.52                            | 7.24, 21.81    | 23.1                       | 19.69, 27.01 | 29.0                        | 25.0, 33.4 | 5.86                             | 0.35, 11.38   |
| Hispanic                                 | 27.2                       | 22.4, 32.6   | 44.6                        | 40.4, 48.9 | 17.40                            | 10.80, 23.98   | 14.2                       | 10.31, 19.30 | 17.4                        | 12.6, 23.6 | 3.22                             | -3.83, 10.26  |
| Private Insurance                        |                            |              |                             |            |                                  |                |                            |              |                             |            |                                  |               |
| White                                    | 32.6                       | 30.2, 35.0   | 32.4                        | 29.8, 35.0 | -0.19                            | -3.58, 3.19    | 31.6                       | 28.89, 34.51 | 35.1                        | 32.6, 37.8 | 3.51                             | -0.20, 7.22   |
| Black                                    | 18.6                       | 14.7, 23.1   | 21.6                        | 17.5, 26.4 | 3.06                             | -3.10, 9.23    | 19.3                       | 15.64, 23.49 | 24.7                        | 20.6, 29.3 | 5.45                             | -0.37, 11.27  |
| Hispanic                                 | 17.3                       | 14.4, 20.7   | 21.4                        | 18.2, 24.9 | 4.03                             | -0.49, 8.55    | 16.5                       | 12.98, 20.74 | 22.9                        | 18.9, 27.5 | 6.40                             | 0.65, 12.15   |
| Other insurance                          |                            |              |                             |            |                                  |                |                            |              |                             |            |                                  |               |
| White                                    | 14.7                       | 12.54, 17.12 | 12.8                        | 10.8, 15.1 | -1.92                            | -5.00, 1.16    | 11.4                       | 9.46, 13.74  | 12.3                        | 10.3, 14.7 | 0.88                             | -2.17, 3.93   |
| Black                                    | 12.7                       | 9.80, 16.29  | 13.4                        | 10.3, 17.3 | 0.72                             | -4.05, 5.49    | 12.8                       | 9.43, 17.09  | 14.2                        | 11.2, 17.8 | 1.39                             | -3.64, 6.43   |
| Hispanic                                 | 9.2                        | 6.43, 13.03  | 9.4                         | 6.6, 13.1  | 0.156                            | -4.37, 4.68    | 8.9                        | 5.71, 13.76  | 8.7                         | 5.4, 13.7  | -0.23                            | -5.86, 5.39   |
| SUD treatment, past year                 |                            |              |                             |            |                                  |                |                            |              |                             |            |                                  |               |
| White                                    | 18.9                       | 16.4, 21.6   | 14.4                        | 12.6, 16.5 | -4.45                            | -7.70, -1.20   | 13.1                       | 10.86, 15.77 | 14.9                        | 12.9, 17.1 | 1.73                             | -1.50, 4.96   |
| Black                                    | 14.8                       | 11.3, 19.2   | 14.1                        | 10.7, 18.2 | -0.76                            | -6.17, 4.64    | 9.5                        | 6.88, 12.923 | 8.1                         | 6.1, 10.7  | -1.37                            | -5.16, 2.41   |
| Hispanic                                 | 9.3                        | 6.7, 12.7    | 10.0                        | 7.5, 13.3  | 0.71                             | -3.41, 4.83    | 8.0                        | 4.81, 12.95  | 7.1                         | 4.8, 10.4  | -0.87                            | -5.70, 3.96   |
| Income-eligible SUD treatment, past year |                            |              |                             |            |                                  |                |                            |              |                             |            |                                  |               |
| White                                    | 17.5                       | 15.0, 20.2   | 13.5                        | 11.7, 15.6 | -3.94                            | -7.16, -0.71   | 11.6                       | 9.38, 14.18  | 13.6                        | 11.7, 15.8 | 2.05                             | -1.09, 5.19   |
| Black                                    | 13.0                       | 9.7, 17.2    | 12.3                        | 9.3, 16.1  | -0.65                            | -5.72, 4.42    | 8.6                        | 6.13, 12.01  | 7.3                         | 5.4, 9.8   | -1.35                            | -5.00, 2.30   |
| Hispanic                                 | 7.8                        | 5.5, 11.1    | 8.9                         | 6.5, 12.0  | 1.00                             | -2.89, 4.90    | 5.6                        | 3.29, 9.28   | 6.3                         | 4.1, 9.5   | 0.75                             | -3.16, 4.66   |

Data from the 2008-2019 National Survey on Drug Use and Health. <sup>A</sup> Low income defined as  $\leq 138\%$  of the Federal Poverty Level (FPL).

<sup>B</sup> Differences were estimated using predicted marginal effects at representative values from multivariable logistic regression models that controlled for age, sex, state-period unemployment, the post-ACA indicator (2014-2019), and the interaction between the post-ACA indicator and the racial/ethnic group.

We then estimated using predicted marginal effects at representative values.
